# Supplementary material for: Dual Actions of A2A and A3 Adenosine Receptor Ligand Prevents Obstruction-Induced Kidney Fibrosis in Mice
Source: MDPI journal article supplement (doi:10.3390/ijms22115667), 2021-05-26
Supplement: s1 [file s1]

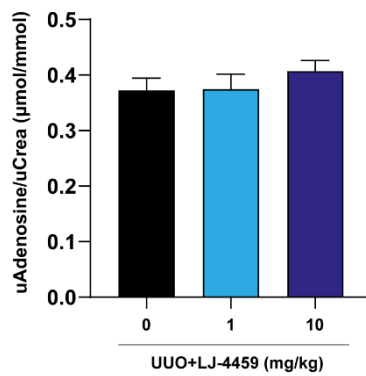

**Supplementary Figure S1.** Effect of LJ-4459 on urinary excretion of adenosine. Data are presented as mean  $\pm$  SE of 7-8 mice.

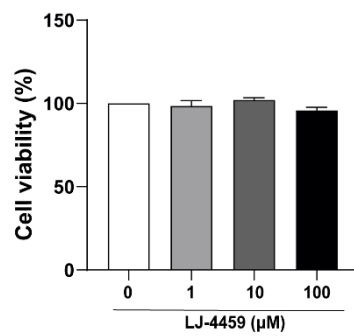

**Supplementary Figure S2.** Effect of LJ-4459 on cell viability of mProx cells. mProx cells were treated with different concentrations of LJ-4459, and cell viability was assessed by MTT assay. Data are presented as mean  $\pm$  SE of 3 independent experiments.

## **Supplementary Methods**

### **Measurement of adenosine**

Urine was collected for 24 h and centrifuged at 3,000 rpm for 15 min at 4 °C. Adenosine was measured by using a fluorometric kit according to the manufacturer's protocol (Abcam, Cambridge, MA, USA).

### **mProx Cell culture**

The mProx cells were maintained in Dulbecco's modified Eagle's medium (DMEM; Invitrogen, Carlsbad, CA, USA) containing 10% fetal bovine serum (FBS; GIBCO by Life Technologies, Carlsbad, CA, USA), 100 U/mL penicillin, 100 µg/mL streptomycin, at 37°C in a humidified incubator with 5% CO<sub>2</sub>.

### **MTT assay**

Cell viability and toxicity were measured using MTT (3-[4, 5-dimethylthiazol-2-yl]-2, 5-diphenyl tetrazolium bromide) assay. The mProx cells were seeded at  $4 \times 10^4$  cells/well in a 96-well plate and treated with LJ-4459 at the concentrations of 1, 10, and 100 µM for 24 h. At the end of treatment, the MTT solution was added to make a final concentration of 1 mg/ml, and the assay was performed according to the manufacturer's instructions (Sigma). The absorbance was measured at 570 nm by ELISA reader (ThermoFisher Scientific, Waltham, MA, USA).
